# Supplementary material
Source: MDPI journal article supplement (https://www.mdpi.com/2304-6740/6/4/114)
Supplement: s1 [file s1]

Archive with 2 entries (2 files):
- CCDC.ZIP
- inorganics-346553-supplementary-layout.pdf
