# Supplementary material
Source: MDPI journal article supplement (https://www.mdpi.com/2304-6740/6/4/114)
Supplement: s1 [file s1]

**Betreff:** CCDC Depository Request CRM:0001001206652

**Von:** CCDC Deposit <deposit\_reply@ccdc.cam.ac.uk>

**Datum:** 25.07.2018 21:43

**An:** Alexander Hoffmann <alexander.hoffmann@ac.rwth-aachen.de>

Dear Depositor,

Thank you for depositing your crystal structure(s) via the joint CCDC/FIZ Karlsruhe deposition service.

The data have been assigned the following deposition numbers which can either be quoted as CCDC Numbers or CSD Numbers. A CCDC Number is usually quoted for an organic or metal-organic structure, whereas a CSD Number is usually quoted for an inorganic structure.

CCDC XXXXXXX-YYYYYYY (generally used for organic and metal-organic structures)

CSD XXXXXXX-YYYYYYY (generally used for inorganic structures)

CCDC 1858298-1858302

-----  
Summary of Data CCDC 1858298  
-----

Compound Name:

Formula: C<sub>17</sub> H<sub>26</sub> Cu<sub>1</sub> I<sub>1</sub> N<sub>6</sub>

Unit Cell Parameters: a 18.055(3) b 26.458(5) c 16.438(3) Fdd2  
-----

-----  
Summary of Data CCDC 1858299  
-----

Compound Name:

Formula: C<sub>17</sub> H<sub>26</sub> Br<sub>1</sub> Cu<sub>1</sub> N<sub>6</sub>

Unit Cell Parameters: a 7.1936(10) b 12.8127(17) c 20.599(3) P21/c  
-----

-----  
Summary of Data CCDC 1858300  
-----

Compound Name:

Formula: C<sub>17</sub> H<sub>26</sub> Cl<sub>1</sub> Cu<sub>1</sub> N<sub>6</sub>

Unit Cell Parameters: a 7.1451(10) b 12.7869(17) c 20.530(3) P21/c  
-----

-----  
Summary of Data CCDC 1858301  
-----

Compound Name:

Formula: C<sub>17</sub> H<sub>26</sub> Cl<sub>2</sub> Cu<sub>1</sub> N<sub>6</sub>

Unit Cell Parameters: a 15.234(3) b 8.1012(14) c 17.631(3) P21/n  
-----

-----  
Summary of Data CCDC 1858302  
-----

Compound Name:

Formula: C<sub>34</sub> H<sub>52</sub> Cu<sub>2</sub> N<sub>12</sub> 2+,2(C<sub>1</sub> F<sub>3</sub> O<sub>3</sub> S<sub>1</sub> 1-)

Unit Cell Parameters: a 13.8689(18) b 14.0995(18) c 14.6916(19) P-1  
-----

After publication your data will be made available through our joint Access Structures service. In addition, organic and metal-organic experimental structures will be curated into the [Cambridge Structural Database](#) and inorganic experimental structures will be curated into the [Inorganic Crystal Structure Database](#).

If you selected "Publish in a Database" your data will be immediately published through our joint Access Structures service.

Please note, if any of these structures are not published within one year from today and we cannot contact you to discuss the matter, then we may publish the data directly through the CSD as a *CSD Communication* or the ICSD as an *ICSD Communication*.

If we have any queries relating to the data then we may contact you later.

Kind Regards,

The CCDC and FIZ Karlsruhe Deposition Teams

Email: [deposit@ccdc.cam.ac.uk](mailto:deposit@ccdc.cam.ac.uk)

The Cambridge Crystallographic Data Centre

<https://www.ccdc.cam.ac.uk>

For more information about CSD Communications see:

<https://www.ccdc.cam.ac.uk/Community/Depositastructure/CSDCommunications/>

FIZ Karlsruhe

[www.fiz-karlsruhe.de](http://www.fiz-karlsruhe.de)

The CCDC and FIZ Karlsruhe are delighted to be working together on shared deposition and access services for crystallographic data across all domains of chemistry

More details can be found in our press release: <https://www.ccdc.cam.ac.uk/News/List/2018-07-new-joint-services/>
