# Supplementary material
Source: MDPI journal article supplement (https://www.mdpi.com/2304-6740/6/4/114)
Supplement: s1 [file s1 › inorganics-346553-supplementary-layout.pdf]

# Supplementary Materials: Fluorescent Bis(guanidine) Copper Complexes as Precursors for Hydroxylation Catalysis

Florian Strassl, Alexander Hoffmann, Benjamin Grimm-Lebsanft, Dieter Rukser, Florian Biebl, Mai Anh Tran, Fabian Metz, Michael Rübhausen and Sonja Herres-Pawlis

NMR Spectra of the Complexes C1-C3, C5-C6.

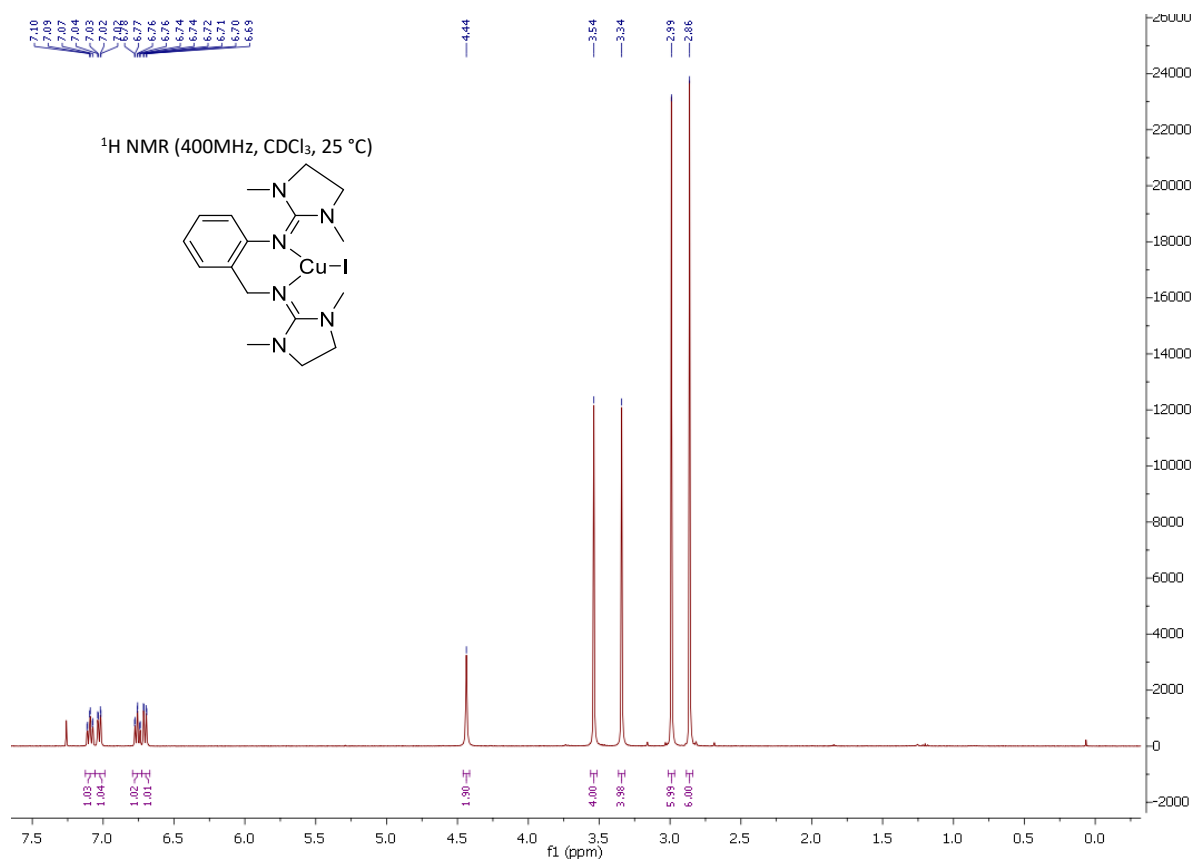

Figure S1. <sup>1</sup>H NMR spectrum of complex C1, measured in CDCl<sub>3</sub>.

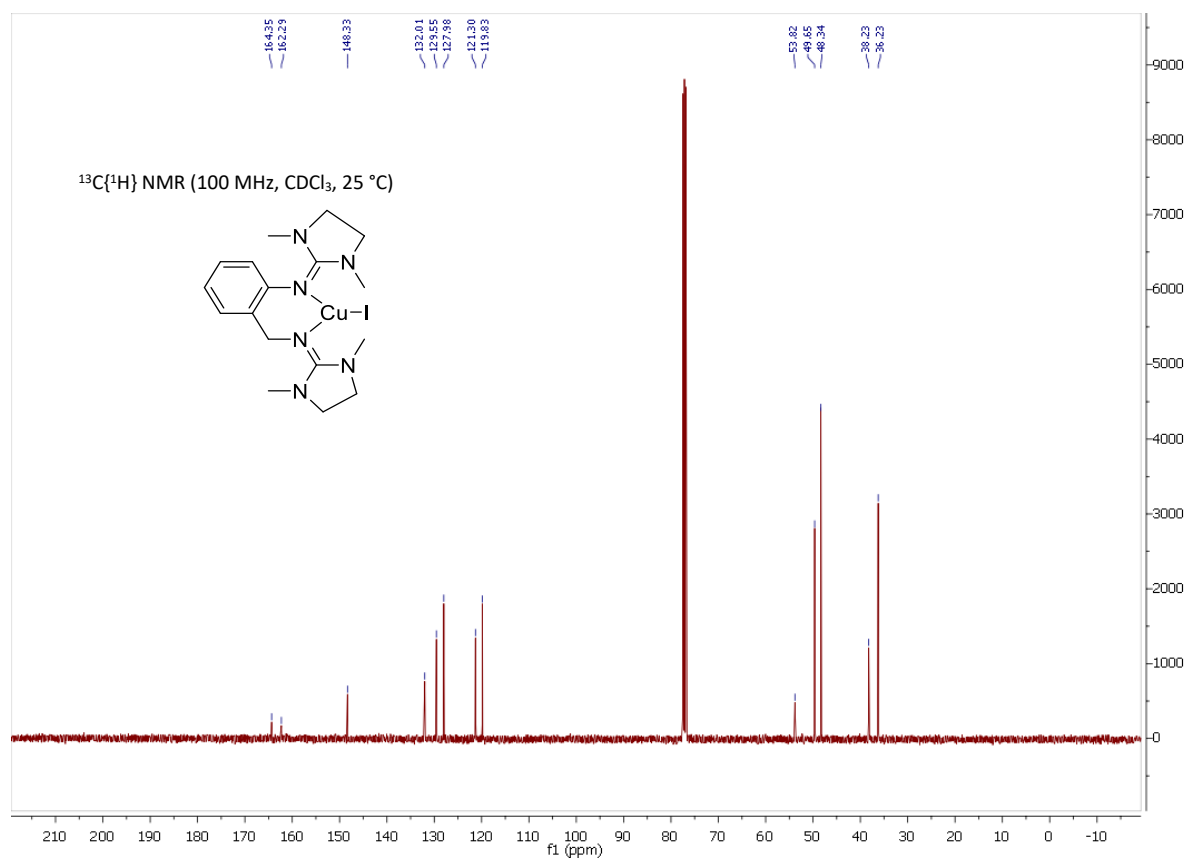

Figure S2.  $^{13}\text{C}\{^1\text{H}\}$  NMR spectrum of complex **C1**, measured in  $\text{CDCl}_3$ .

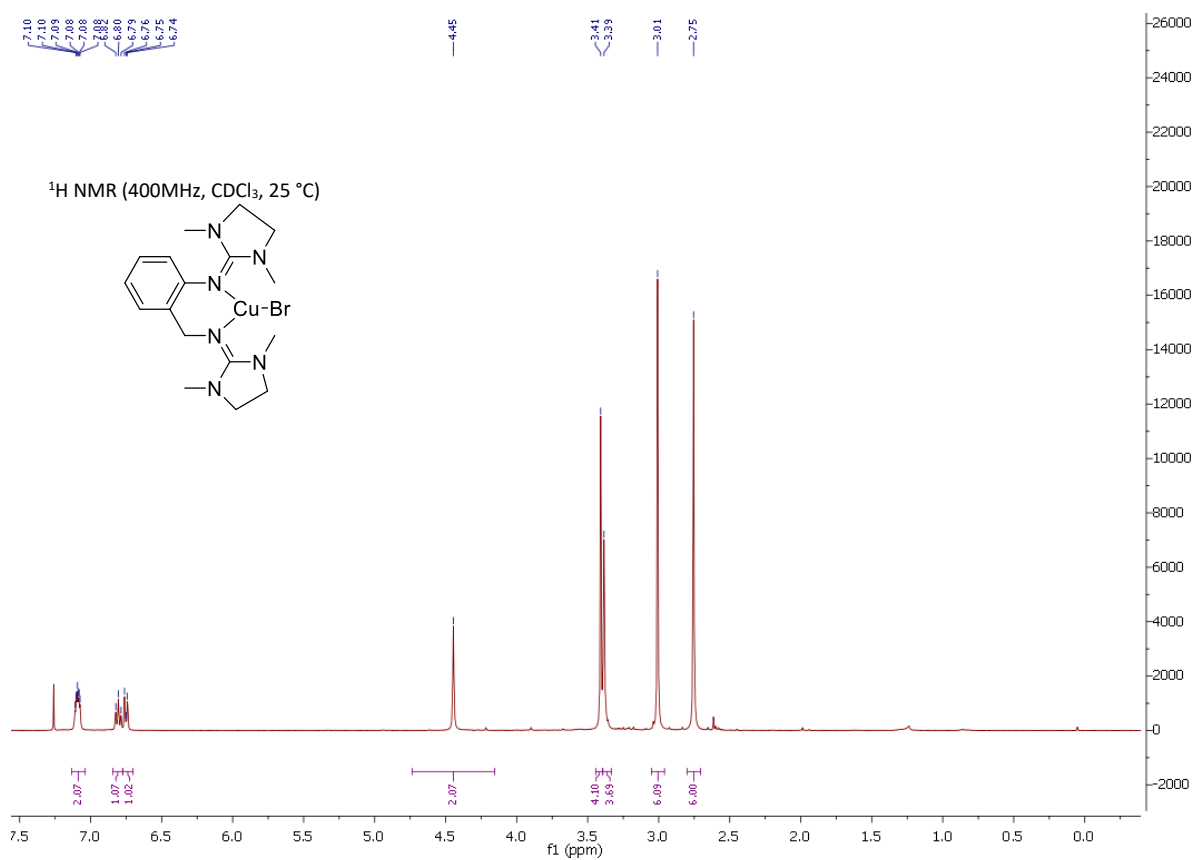

Figure S3.  $^1\text{H}$  NMR spectrum of complex **C2**, measured in  $\text{CDCl}_3$ .

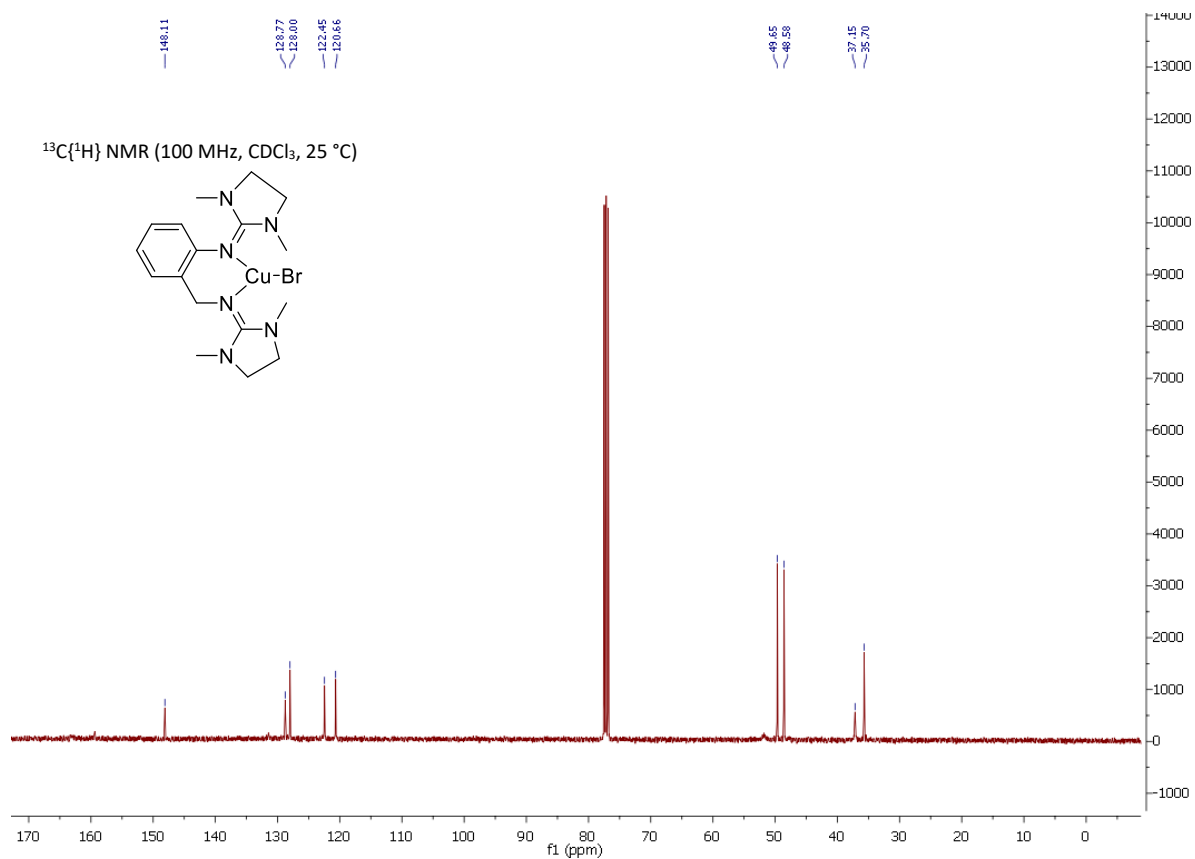Figure S4.  $^{13}\text{C}\{^1\text{H}\}$  NMR spectrum of complex **C2**, measured in  $\text{CDCl}_3$ .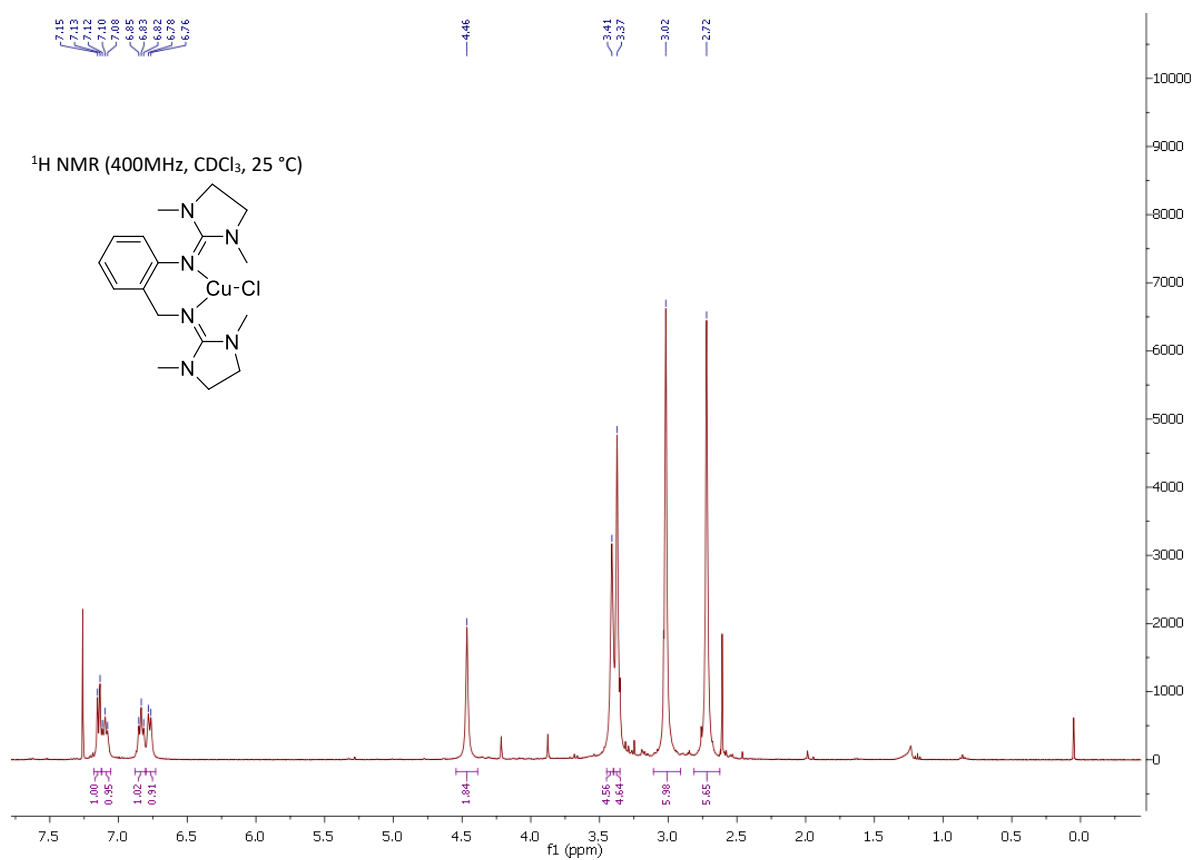Figure S5.  $^1\text{H}$  NMR spectrum of complex **C3**, measured in  $\text{CD}_3\text{CN}$ .

Due to the very low solubility of the complex, a  $^{13}\text{C}$  NMR spectrum could not be obtained for

complex **C3**.

Due to the paramagnetic properties of copper(II) and the very low solubility of the complex, NMR spectra could not be obtained for complex **C4**.

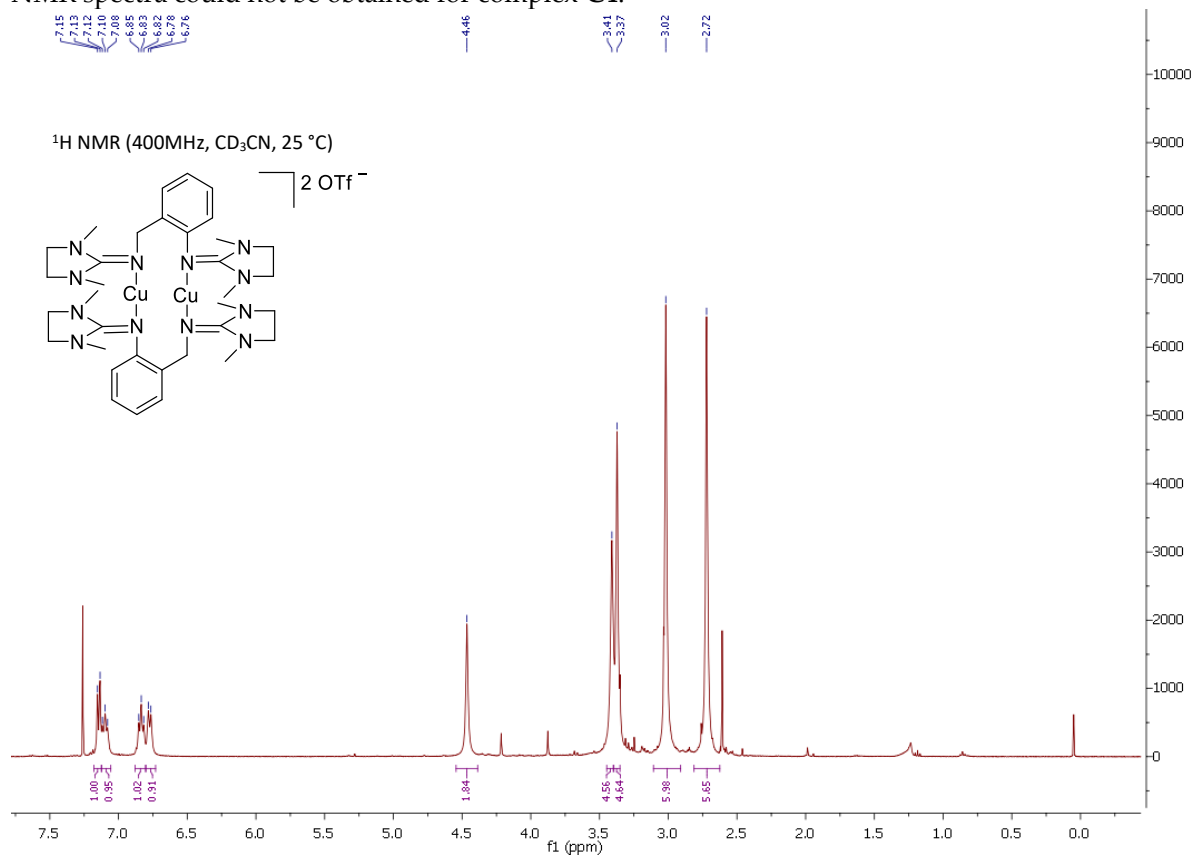

Figure S6. <sup>1</sup>H NMR spectrum of complex **C5**, measured in CD<sub>3</sub>CN.

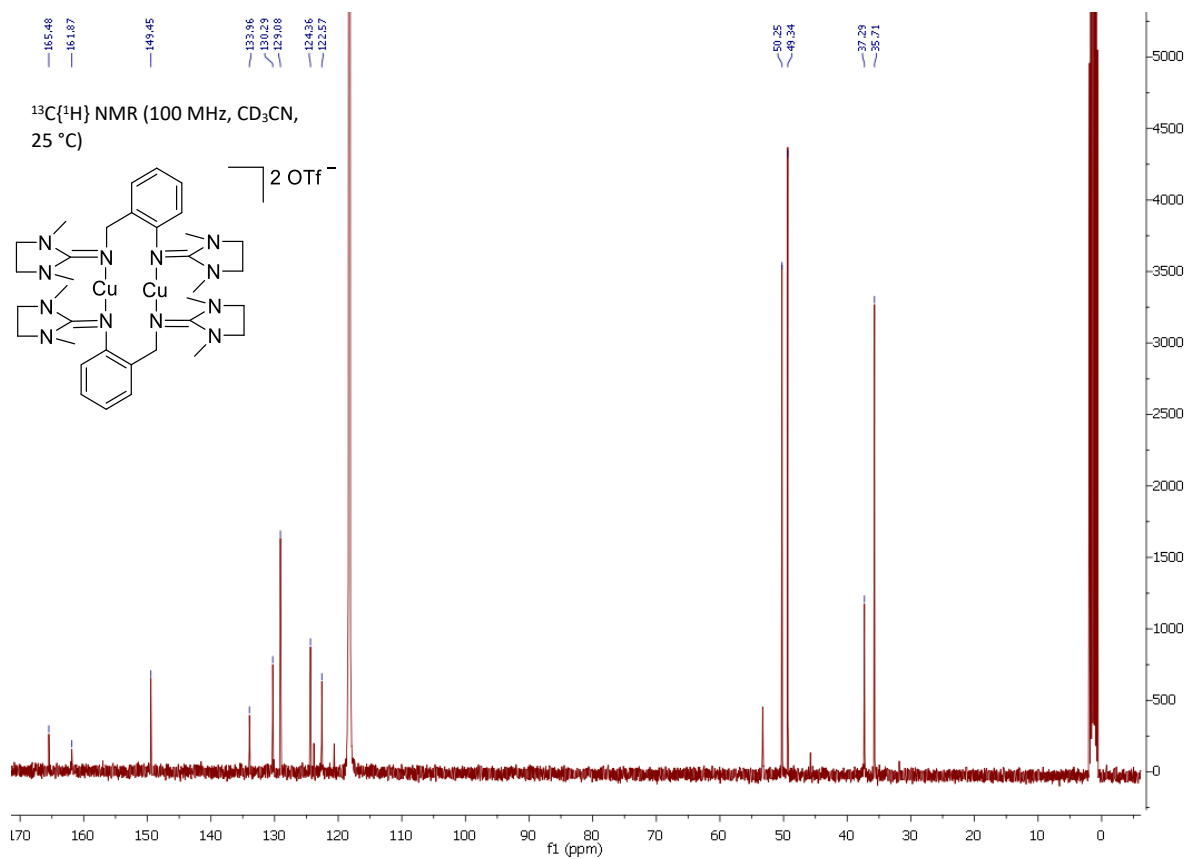

**Figure S7.**  $^{13}\text{C}\{^1\text{H}\}$  NMR spectrum of complex **C5**, measured in  $\text{CD}_3\text{CN}$ .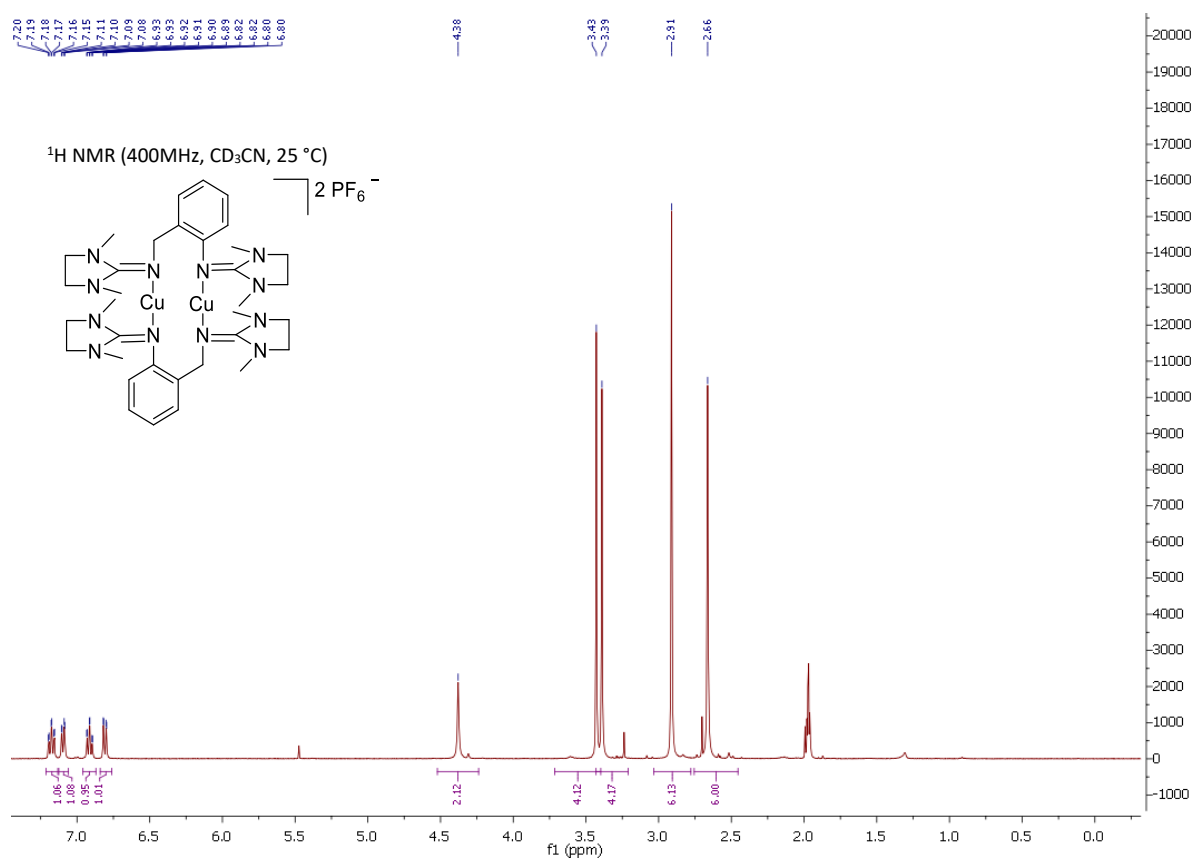**Figure S8.**  $^1\text{H}$  NMR spectrum of complex **C6**, measured in  $\text{CD}_3\text{CN}$ .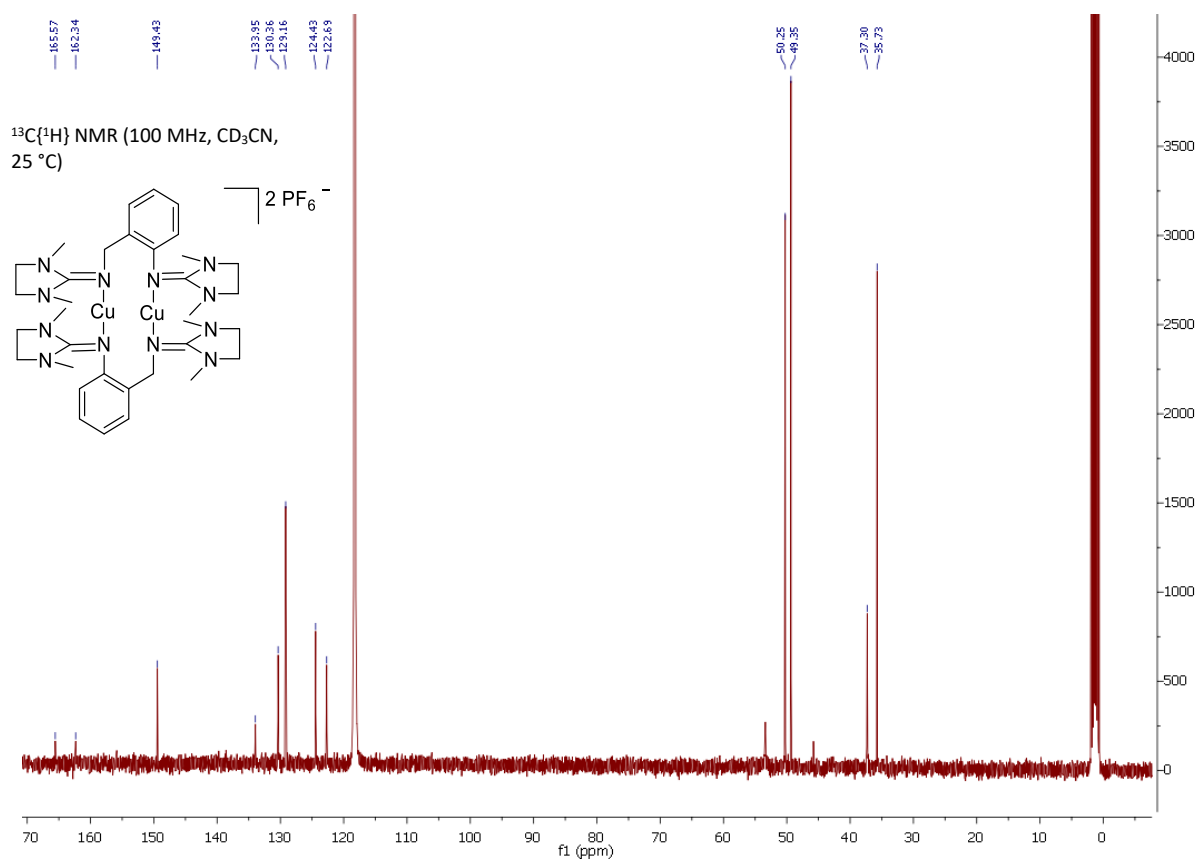**Figure S9.**  $^{13}\text{C}\{^1\text{H}\}$  NMR spectrum of complex **C6**, measured in  $\text{CD}_3\text{CN}$ .
